# Supplementary material for: Biochemical and biophysical analyses of tight junction permeability made of claudin-16 and claudin-19 dimerization
Source: PubMed Central journal article supplement — Mol Biol Cell. 2015 Dec 1;26(24):4333–46. doi: 10.1091/mbc.E15-06-0422 (PMC4666130; doi:10.1091/mbc.e15-06-0422), 2015-12-01
Supplement: supp_E15-06-0422v1_CombinedSupMats.pdf [file supp_E15-06-0422v1_CombinedSupMats.pdf]

# Supplemental Materials

*Molecular Biology of the Cell*

Gong et al.

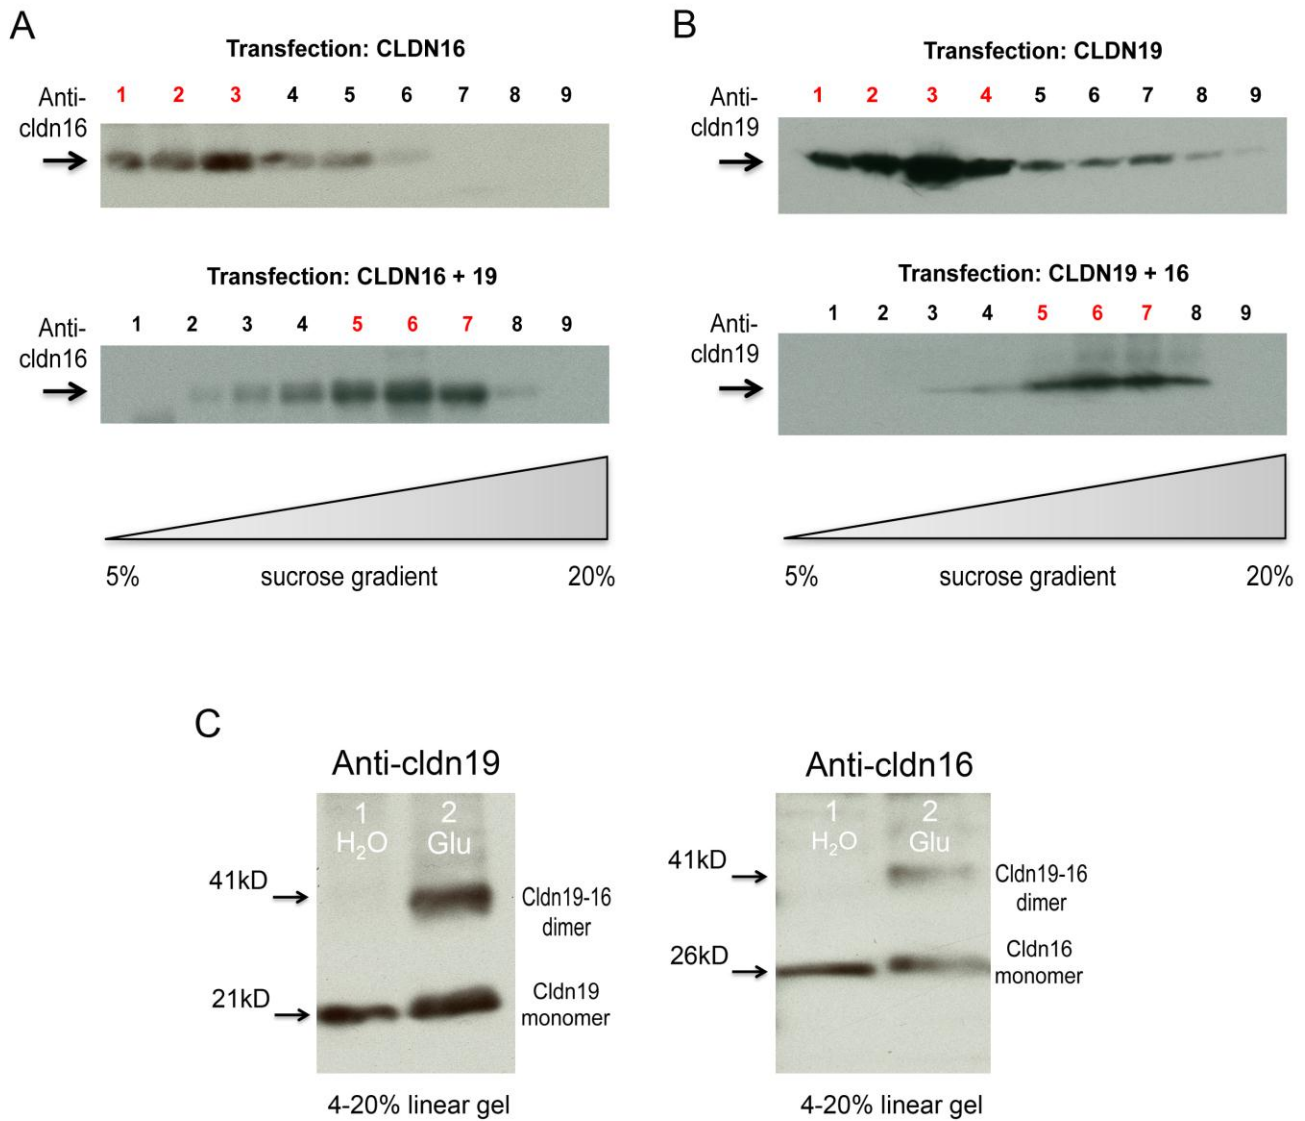

**Figure S1.** Biochemical analyses of claudin-16 and -19 assembly in Sf9 cells. Triton soluble cell lysate from singly or doubly infected claudin expressing cells were fractionated on 5-20% linear sucrose gradients and blotted with anti-claudin-16 (A) or anti-claudin-19 (B) antibody. (C) Linear SDS-PAGE gel electrophoresis to determine the molecular weight of claudin oligomer and monomer.

## Cldn19/pAlg5

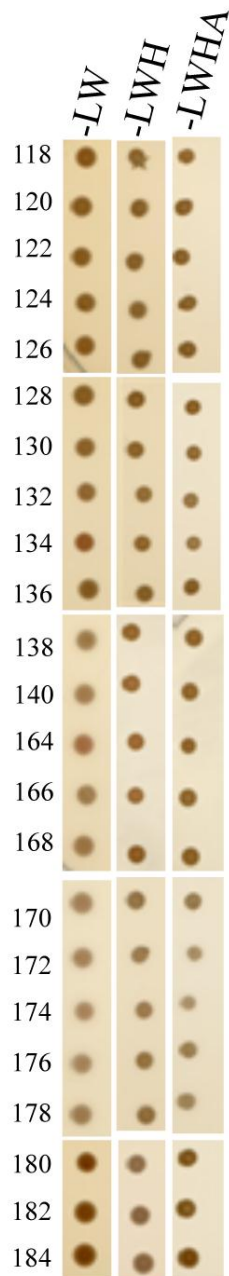

## Cldn16/pAlg5

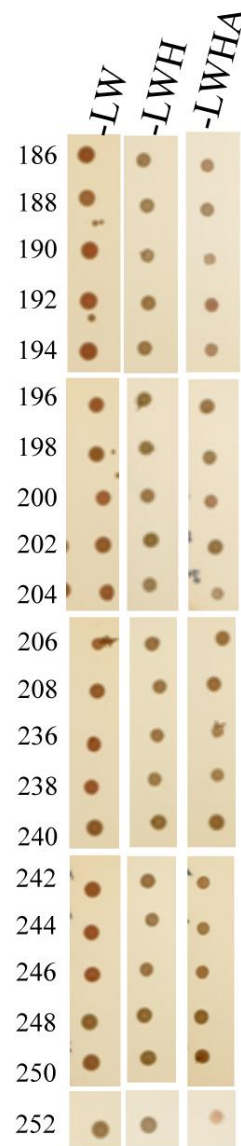

**Figure S2.** Determination of protein folding using Y2H. The claudin-16 or -19 mutant proteins were co-expressed with the yeast ER protein Alg5 in the bait-prey format. If the mutant claudin protein passes ER quality control and is properly inserted into the plasma membrane, co-expression with Alg5 will result in activation of reporter genes due to direct binding of Alg5 with ubiquitin that is fused to the mutant protein. Shown are plates with selective medium lacking leucine and tryptophan (-LW), indicating the transforming of both bait and prey vectors; with SD-LWH, indicating the expression of reporter gene HIS3; with SD-LWHA, indicating the expression of reporter genes HIS3 and ADE2.

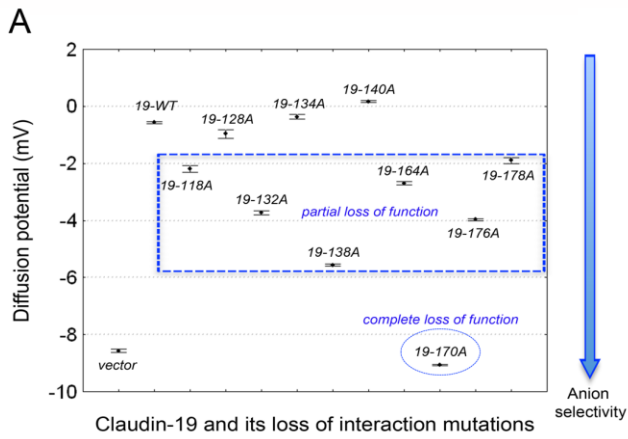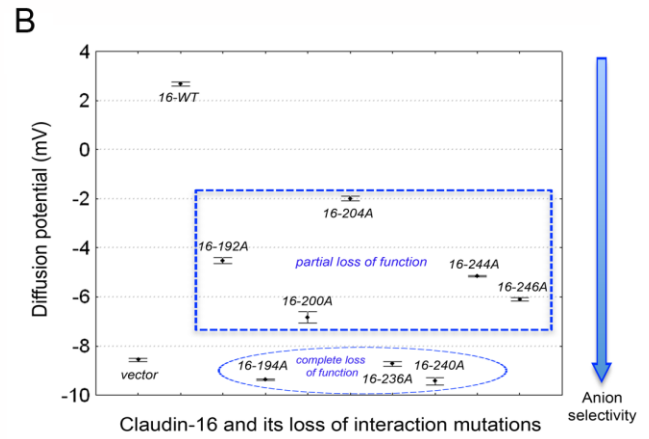

**Figure S3.** Effect of alanine insertion mutations on claudin function. (A) Diffusion potential values across LLC-PK1 cell monolayers expressing wildtype claudin-19 and its loss-of-interaction mutations are shown. (B) Diffusion potential values across LLC-PK1 cell monolayers expressing wildtype claudin-16 and its loss-of-interaction mutations are shown.

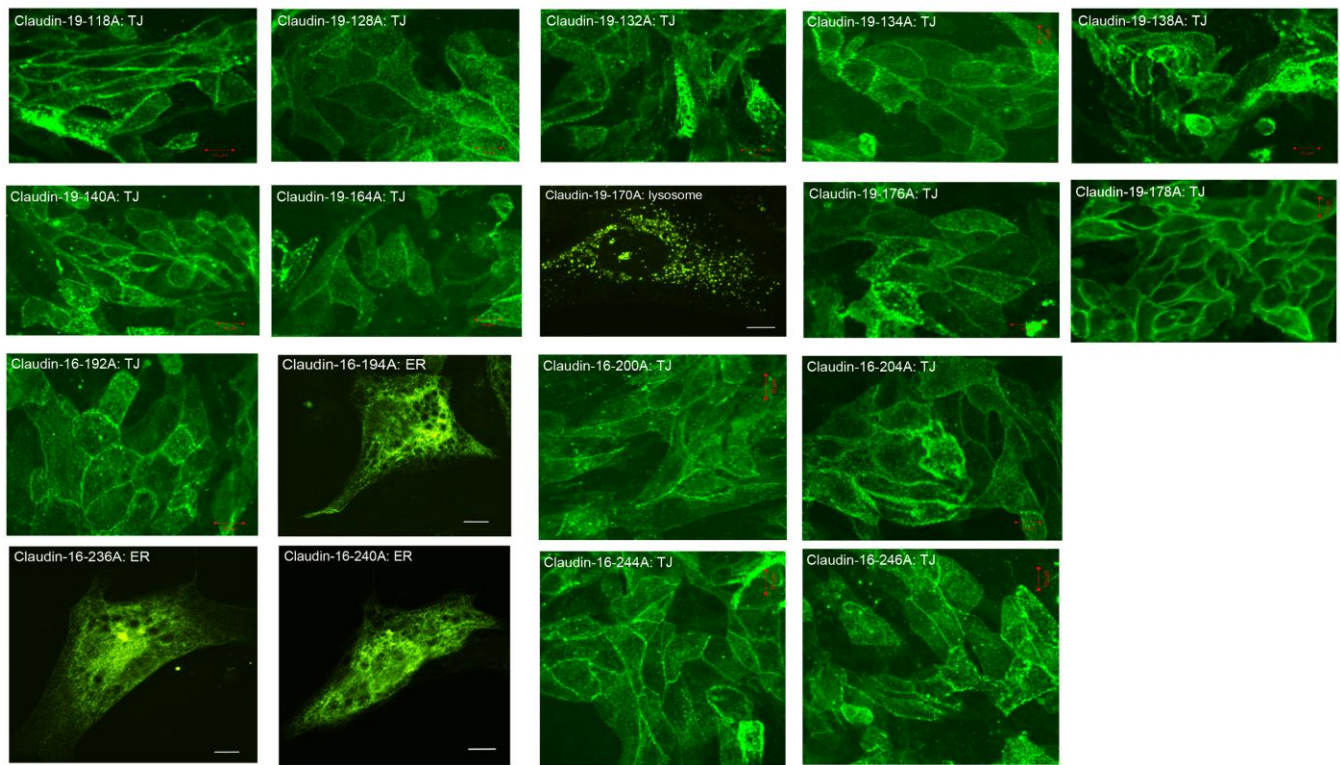

Figure S4. Effect of alanine insertion mutations on claudin localization. Confocal microscopy showed the subcellular localization of claudin-16 and -19 loss-of-interaction mutations. ER: endoplasmic reticulum; TJ: tight junction. Bar: 10 $\mu$ m.

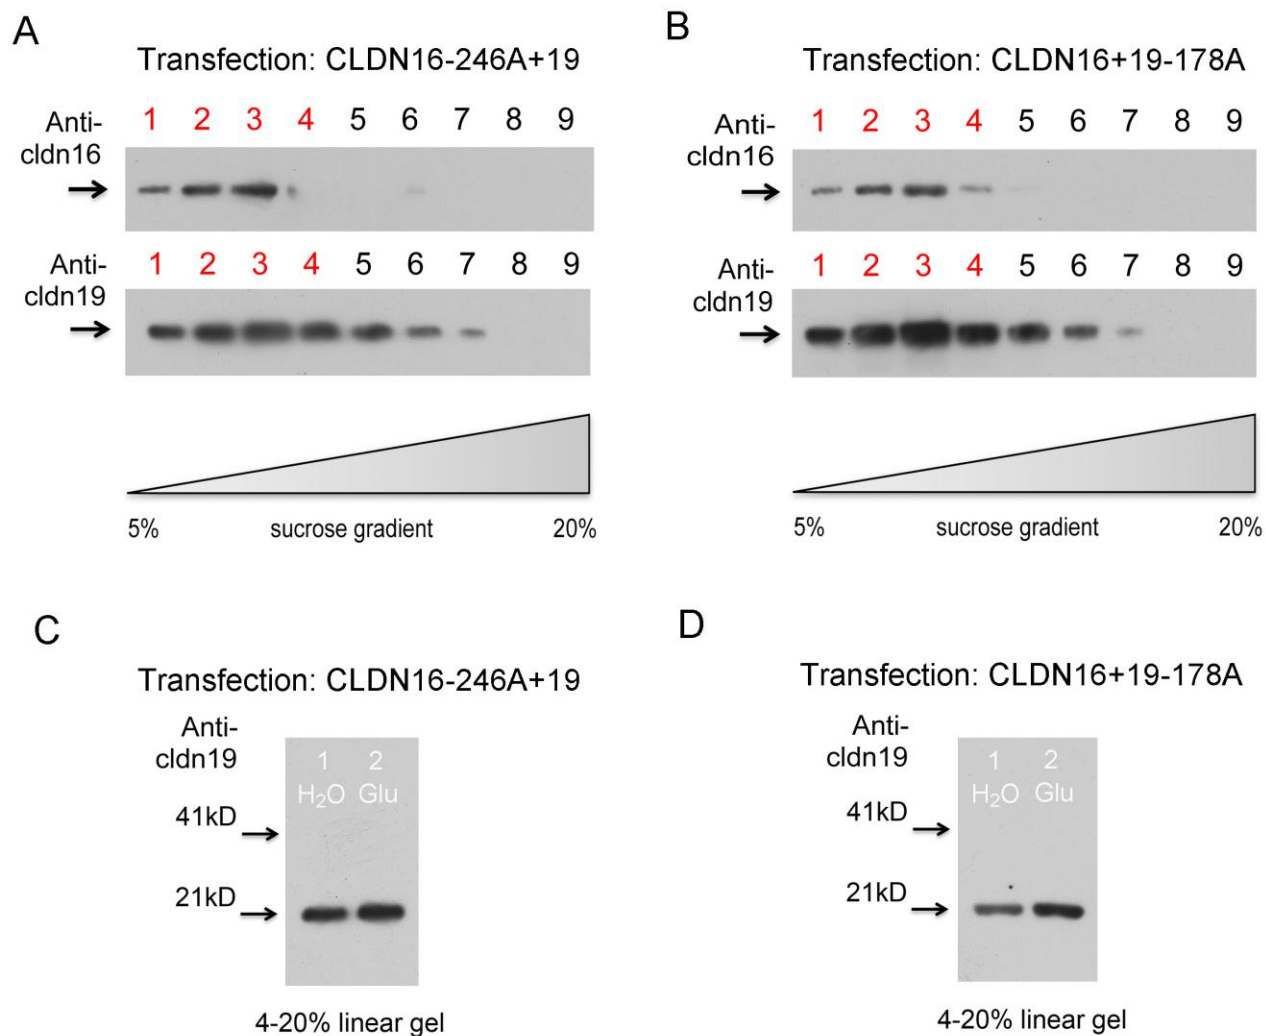

**Figure S5.** Mutational effects on claudin-16 and -19 assembly in HEK293 cells. (A-B) Triton soluble cell lysate from doubly infected cells expressing cldn16-246A mutant with wildtype cldn19 (A) or cldn19-178A mutant with wildtype cldn16 (B) were fractionated on 5-20% linear sucrose gradients and blotted with anti-claudin-16 or anti-claudin-19 antibody. (C-D) The fractionated cell lysates from A and B were pooled, cross-linked with glutaraldehyde, and subjected to linear SDS-PAGE gel electrophoresis to determine the molecular weight of claudin oligomer and monomer.

A

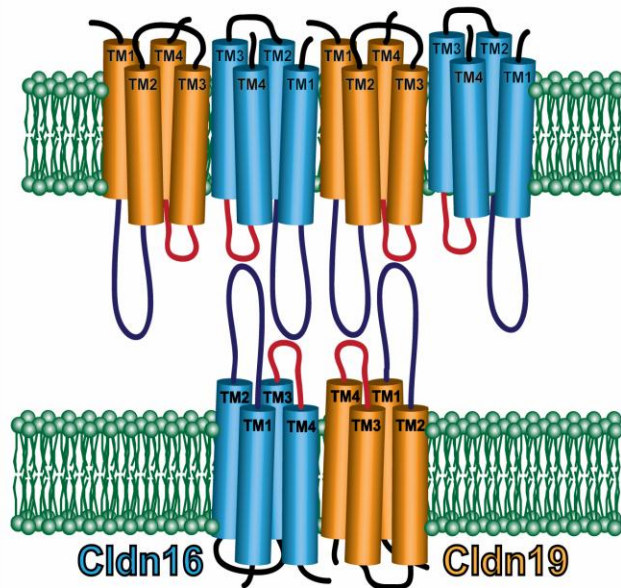

B

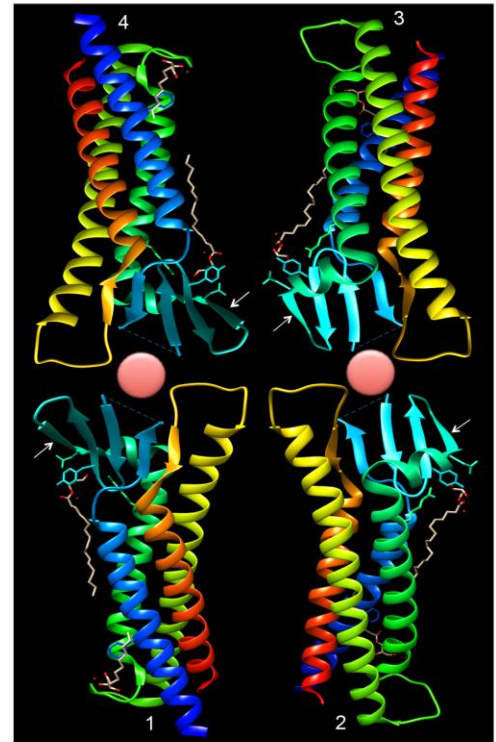

**Figure S6.** Claudin polymerization model in tight junction. (A) Cartoon showing how *cis*- and *trans*-interaction between claudin-16 and -19 polymerize them into tight junction strand. (B) Claudin interaction model based upon the 3D structure of claudin-15 to illustrate the ion permeation pore. Arrows indicate the 4<sup>th</sup>  $\beta$ -sheet of ECL1 where the charged residues contribute to the electrostatic field. Permeation ions are shown in red dot.



Table S1. Paracellular ion conductance in LLC-PK1 cells expressing claudin-19 and its loss-of-interaction mutants.

| Construct             | Position of mutation | TER ( $\Omega \cdot \text{cm}^2$ ) | Dilution potential (mV) | $P_{\text{Na}}/P_{\text{Cl}}$ | $P_{\text{Na}}$ ( $10^{-6}$ cm/s) | $P_{\text{Cl}}$ ( $10^{-6}$ cm/s) | Localization |
|-----------------------|----------------------|------------------------------------|-------------------------|-------------------------------|-----------------------------------|-----------------------------------|--------------|
| vector                | -                    | 66.3±0.7                           | -8.57±0.07              | 0.272±0.003                   | 5.922±0.105                       | 21.750±0.197                      | -            |
| CLDN19-WT             | -                    | 136.3±5.2                          | -0.57±0.03              | 0.926±0.004                   | 6.493±0.248                       | 7.009±0.265                       | TJ           |
| CLDN19-118A           | 3rd TM               | 180.3±1.5                          | -2.20±0.12              | 0.742±0.012                   | 4.336±0.066                       | 5.843±0.040                       | TJ           |
| CLDN19-128A           | 3rd TM               | 143.0±3.5                          | -0.97±0.15              | 0.878±0.017                   | 6.009±0.200                       | 6.841±0.117                       | TJ           |
| CLDN19-132A           | 3rd TM               | 83.7±3.0                           | -3.73±0.07              | 0.599±0.006                   | 8.232±0.266                       | 13.760±0.535                      | TJ           |
| CLDN19-134A           | 3rd TM               | 138.7±14.85                        | -0.37±0.09              | 0.952±0.011                   | 6.596±0.665                       | 6.924±0.664                       | TJ           |
| CLDN19-138A           | 3rd TM               | 73.0±2.0                           | -5.57±0.03              | 0.456±0.002                   | 7.883±0.183                       | 17.293±0.487                      | TJ           |
| CLDN19-140A           | 3rd TM               | 155.0±2.1                          | 0.17±0.03               | 1.023±0.005                   | 5.990±0.092                       | 5.856±0.065                       | TJ           |
| CLDN19-164A           | 4th TM               | 97.7±2.8                           | -2.70±0.06              | 0.692±0.006                   | 7.699±0.198                       | 11.130±0.368                      | TJ           |
| CLDN19-170A           | 4th TM               | 68.3±0.9                           | -9.07±0.03              | 0.246±0.002                   | 5.308±0.042                       | 21.560±0.304                      | Lysosome     |
| CLDN19-176A           | 4th TM               | 81.0±1.2                           | -3.97±0.03              | 0.579±0.003                   | 8.311±0.141                       | 14.357±0.182                      | TJ           |
| CLDN19-178A           | 4th TM               | 154.3±3.4                          | -1.90±0.10              | 0.773±0.011                   | 5.189±0.106                       | 6.714±0.162                       | TJ           |
| CLDN19-WT+CLDN16-WT   | -                    | 63.7±2.2                           | 8.40±0.20               | 3.566±0.141                   | 22.540±0.571                      | 6.353±0.393                       | CLDN19 : TJ  |
| CLDN19-118A+CLDN16-WT | CLDN19: 3rd TM       | 212.7±1.2                          | -0.03±0.03              | 0.996±0.004                   | 4.306±0.034                       | 4.325±0.015                       | CLDN19 : TJ  |
| CLDN19-128A+CLDN16-WT | CLDN19: 3rd TM       | 170.7±5.8                          | 3.80±0.06               | 1.687±0.014                   | 6.766±0.213                       | 4.013±0.159                       | CLDN19 : TJ  |
| CLDN19-132A+CLDN16-WT | CLDN19: 3rd TM       | 101.0±1.0                          | 0.83±0.12               | 1.119±0.018                   | 9.600±0.166                       | 8.576±0.022                       | CLDN19 : TJ  |
| CLDN19-134A+CLDN16-WT | CLDN19: 3rd TM       | 176.3±1.5                          | 1.93±0.03               | 1.300±0.006                   | 5.883±0.038                       | 4.527±0.048                       | CLDN19 : TJ  |
| CLDN19-138A+CLDN16-WT | CLDN19: 3rd TM       | 88.3±1.5                           | 0.13±0.07               | 1.018±0.009                   | 10.487±0.136                      | 10.303±0.208                      | CLDN19 : TJ  |
| CLDN19-140A+CLDN16-WT | CLDN19: 3rd TM       | 202.7±1.2                          | 2.93±0.03               | 1.492±0.007                   | 5.423±0.040                       | 3.634±0.016                       | CLDN19 : TJ  |
| CLDN19-164A+CLDN16-WT | CLDN19: 4th TM       | 78.0±1.0                           | 3.47±0.09               | 1.609±0.020                   | 14.513±0.125                      | 9.025±0.185                       | CLDN19 : TJ  |



|                               |                   |               |            |                 |                 |                 |                |
|-------------------------------|-------------------|---------------|------------|-----------------|-----------------|-----------------|----------------|
| CLDN19-<br>176A+CLDN1<br>6-WT | CLDN19:<br>4th TM | 108.3±1<br>.5 | -2.60±0.17 | 0.702±0.<br>017 | 6.991±0.16<br>2 | 9.960±0.1<br>29 | CLDN19<br>: TJ |
| CLDN19-<br>178A+CLDN1<br>6-WT | CLDN19:<br>4th TM | 194.7±3<br>.0 | 0.27±0.15  | 1.037±0.<br>020 | 4.802±0.10<br>9 | 4.631±0.0<br>56 | CLDN19<br>: TJ |

Table S2. Paracellular ion conductance in LLC-PK1 cells expressing claudin-16 and its loss-of-interaction mutants.

| Construct             | Position of mutation | TER ( $\Omega \cdot \text{cm}^2$ ) | Dilution potential (mV) | $P_{\text{Na}}/P_{\text{Cl}}$ | $P_{\text{Na}}$ ( $10^{-6} \text{cm/s}$ ) | $P_{\text{Cl}}$ ( $10^{-6} \text{cm/s}$ ) | Localization |
|-----------------------|----------------------|------------------------------------|-------------------------|-------------------------------|-------------------------------------------|-------------------------------------------|--------------|
| vector                | -                    | 66.3±0.7                           | -8.57±0.07              | 0.272±0.03                    | 5.922±0.105                               | 21.750±0.197                              | -            |
| CLDN16-WT             | -                    | 40.7±2.7                           | 2.67±0.09               | 1.438±0.018                   | 26.867±1.843                              | 18.657±1.064                              | TJ           |
| CLDN16-192A           | 3rd TM               | 49.0±2.5                           | -4.53±0.12              | 0.533±0.009                   | 13.073±0.511                              | 24.573±1.337                              | TJ           |
| CLDN16-194A           | 3rd TM               | 65.3±1.8                           | -9.37±0.03              | 0.231±0.002                   | 5.283±0.141                               | 22.853±0.636                              | ER           |
| CLDN16-200A           | 3rd TM               | 53.3±3.2                           | -6.83±0.24              | 0.372±0.015                   | 9.407±0.706                               | 25.270±1.555                              | TJ           |
| CLDN16-204A           | 3rd TM               | 52.7±2.4                           | -2.00±0.10              | 0.763±0.010                   | 15.133±0.598                              | 19.867±1.061                              | TJ           |
| CLDN16-236A           | 4th TM               | 67.3±0.3                           | -8.73±0.09              | 0.263±0.005                   | 5.684±0.105                               | 21.573±0.041                              | ER           |
| CLDN16-240A           | 4th TM               | 72.7±1.7                           | -9.43±0.15              | 0.228±0.007                   | 4.693±0.152                               | 20.593±0.492                              | ER           |
| CLDN16-244A           | 4th TM               | 57.7±2.2                           | -5.17±0.03              | 0.485±0.002                   | 10.420±0.405                              | 21.493±0.766                              | TJ           |
| CLDN16-246A           | 4th TM               | 69.0±0.6                           | -6.10±0.06              | 0.419±0.004                   | 7.857±0.015                               | 18.747±0.208                              | TJ           |
| CLDN19-WT+CLDN16-WT   | -                    | 63.7±2.2                           | 8.40±0.20               | 3.566±0.141                   | 22.540±0.571                              | 6.353±0.393                               | CLDN16: TJ   |
| CLDN19-WT+CLDN16-192A | CLDN16: 3rd TM       | 201.3±3.5                          | 0.73±0.12               | 1.104±0.018                   | 4.786±0.068                               | 4.336±0.102                               | CLDN16: TJ   |
| CLDN19-WT+CLDN16-200A | CLDN16: 3rd TM       | 199.7±3.2                          | -1.03±0.09              | 0.870±0.010                   | 4.279±0.095                               | 4.918±0.052                               | CLDN16: TJ   |
| CLDN19-WT+CLDN16-204A | CLDN16: 3rd TM       | 195.7±1.5                          | 2.00±0.06               | 1.312±0.010                   | 5.323±0.058                               | 4.058±0.012                               | CLDN16: TJ   |
| CLDN19-WT+CLDN16-244A | CLDN16: 4th TM       | 160.3±10.3                         | 0.17±0.15               | 1.023±0.020                   | 5.846±0.450                               | 5.702±0.338                               | CLDN16: TJ   |
| CLDN19-WT+CLDN16-246A | CLDN16: 4th TM       | 178.7±2.4                          | 1.03±0.20               | 1.151±0.032                   | 5.496±0.085                               | 4.781±0.109                               | CLDN16: TJ   |
